# Supplementary material for: Specific MicroRNA Pattern in Colon Tissue of Young Children with Eosinophilic Colitis
Source: MDPI journal article supplement (doi:10.3390/ijms18051050), 2017-05-12
Supplement: s1 [file s1]

**Supplementary table 1.** List of dysregulated microRNAs in the NGS experiment

| <i>microRNA ID</i>      | <i>P-value (EC vs. K)</i> | <i>Fold change (EC vs. K)</i> |
|-------------------------|---------------------------|-------------------------------|
| <i>hsa-mir-10b</i>      | 0.74                      | -1.09                         |
| <i>hsa-mir-192</i>      | 0.32                      | -1.69                         |
| <i>hsa-mir-26a-1</i>    | 0.01                      | -14.90                        |
| <i>hsa-mir-10a</i>      | 0.11                      | 1.71                          |
| <i>hsa-mir-143</i>      | 0.32                      | -1.51                         |
| <i>hsa-mir-375</i>      | 0.35                      | 1.88                          |
| <i>hsa-mir-148a</i>     | 0.04                      | 2.05                          |
| <i>hsa-mir-181a-2</i>   | 0.35                      | 1.48                          |
| <i>hsa-mir-191</i>      | 0.01                      | -13.04                        |
| <i>hsa-mir-21</i>       | 0.00                      | 3.55                          |
| <i>hsa-mir-378</i>      | 0.46                      | 1.43                          |
| <i>hsa-mir-27b</i>      | 0.01                      | 2.77                          |
| <i>hsa-mir-22</i>       | 0.04                      | 3.97                          |
| <i>hsa-let-7a-1</i>     | 0.16                      | -2.52                         |
| <i>hsa-let-7f-2</i>     | 0.33                      | -1.96                         |
| <i>hsa-mir-378c</i>     | 0.17                      | 2.15                          |
| <i>hsa-mir-92a-2</i>    | 0.00                      | 3.58                          |
| <i>hsa-mir-28</i>       | 0.18                      | 1.62                          |
| <i>hsa-mir-141</i>      | 0.22                      | 1.79                          |
| <i>hsa-mir-486</i>      | 0.97                      | -1.02                         |
| <i>hsa-let-7i</i>       | 0.10                      | 1.61                          |
| <i>hsa-mir-142</i>      | 0.10                      | 2.21                          |
| <i>hsa-let-7g</i>       | 0.33                      | -1.47                         |
| <i>hsa-mir-146a</i>     | 0.03                      | 5.62                          |
| <i>hsa-mir-27a</i>      | 0.02                      | 2.56                          |
| <i>hsa-mir-186</i>      | 0.31                      | 1.80                          |
| <i>hsa-mir-30a</i>      | 0.28                      | 1.56                          |
| <i>hsa-mir-451</i>      | 0.05                      | -6.75                         |
| <i>hsa-mir-215</i>      | 0.38                      | -1.50                         |
| <i>hsa-mir-127</i>      | 0.13                      | -2.28                         |
| <i>hsa-mir-16-2</i>     | 0.06                      | 3.20                          |
| <i>hsa-let-7b</i>       | 0.19                      | -1.47                         |
| <i>hsa-mir-99b</i>      | 0.66                      | 1.37                          |
| <i>hsa-mir-145</i>      | 0.09                      | -3.65                         |
| <i>hsa-mir-25</i>       | 0.00                      | 2.67                          |
| <i>hsa-mir-103-1-as</i> | 0.07                      | 4.78                          |
| <i>hsa-mir-125a</i>     | 0.15                      | -2.29                         |
| <i>hsa-mir-126</i>      | 0.11                      | -1.61                         |
| <i>hsa-mir-194-2</i>    | 0.80                      | -1.14                         |
| <i>hsa-mir-182</i>      | 0.14                      | -2.07                         |
| <i>hsa-mir-151</i>      | 0.78                      | -1.10                         |
| <i>hsa-mir-101-2</i>    | 0.89                      | 1.04                          |

|                       |      |        |
|-----------------------|------|--------|
| <i>hsa-mir-19b-2</i>  | 0.12 | -2.09  |
| <i>hsa-mir-30d</i>    | 0.02 | 2.07   |
| <i>hsa-mir-199a-1</i> | 0.36 | 1.74   |
| <i>hsa-mir-200c</i>   | 0.61 | -1.25  |
| <i>hsa-mir-221</i>    | 0.06 | 2.83   |
| <i>hsa-mir-199b</i>   | 0.20 | 2.28   |
| <i>hsa-mir-98</i>     | 0.72 | -1.32  |
| <i>hsa-mir-29a</i>    | 0.11 | 3.04   |
| <i>hsa-mir-320a</i>   | 0.18 | 2.46   |
| <i>hsa-mir-3184</i>   | 0.05 | 4.58   |
| <i>hsa-mir-181b-2</i> | 0.06 | 2.58   |
| <i>hsa-mir-100</i>    | 0.20 | 3.26   |
| <i>hsa-mir-30b</i>    | 0.00 | -8.64  |
| <i>hsa-mir-24-1</i>   | 0.59 | 1.38   |
| <i>hsa-mir-26b</i>    | 0.85 | -1.12  |
| <i>hsa-mir-146b</i>   | 0.10 | -2.65  |
| <i>hsa-mir-429</i>    | 0.08 | 2.66   |
| <i>hsa-mir-93</i>     | 0.06 | -3.92  |
| <i>hsa-mir-23a</i>    | 0.28 | 1.85   |
| <i>hsa-mir-532</i>    | 0.15 | 1.69   |
| <i>hsa-mir-30e</i>    | 0.18 | 1.83   |
| <i>hsa-mir-23b</i>    | 0.92 | -1.08  |
| <i>hsa-mir-200a</i>   | 0.10 | 2.13   |
| <i>hsa-mir-181c</i>   | 0.07 | 2.17   |
| <i>hsa-mir-574</i>    | 0.02 | -3.62  |
| <i>hsa-mir-203</i>    | 0.30 | 1.39   |
| <i>hsa-mir-155</i>    | 0.62 | -1.49  |
| <i>hsa-mir-1307</i>   | 0.04 | 3.68   |
| <i>hsa-mir-340</i>    | 0.46 | 1.38   |
| <i>hsa-mir-148b</i>   | 0.29 | 1.62   |
| <i>hsa-mir-769</i>    | 0.20 | -1.67  |
| <i>hsa-mir-150</i>    | 0.23 | -1.78  |
| <i>hsa-mir-92b</i>    | 0.00 | 5.76   |
| <i>hsa-mir-106b</i>   | 0.24 | 1.44   |
| <i>hsa-mir-342</i>    | 0.54 | -1.45  |
| <i>hsa-let-7d</i>     | 0.10 | 1.64   |
| <i>hsa-mir-200b</i>   | 0.98 | 1.01   |
| <i>hsa-mir-425</i>    | 0.67 | 1.28   |
| <i>hsa-mir-195</i>    | 0.67 | -1.20  |
| <i>hsa-let-7e</i>     | 0.20 | -3.17  |
| <i>hsa-mir-30c-2</i>  | 0.01 | -5.77  |
| <i>hsa-mir-23c</i>    | 0.59 | -26.81 |
| <i>hsa-mir-125b-2</i> | 0.71 | 1.25   |
| <i>hsa-mir-19a</i>    | 0.24 | -1.72  |
| <i>hsa-mir-210</i>    | 0.20 | 1.57   |
| <i>hsa-mir-29c</i>    | 0.64 | 1.33   |

|                       |      |        |
|-----------------------|------|--------|
| <i>hsa-mir-130a</i>   | 0.03 | 5.14   |
| <i>hsa-mir-941-3</i>  | 0.94 | 1.05   |
| <i>hsa-mir-381</i>    | 0.04 | 4.13   |
| <i>hsa-mir-196b</i>   | 0.14 | -2.41  |
| <i>hsa-mir-15a</i>    | 0.02 | 6.09   |
| <i>hsa-mir-361</i>    | 0.41 | 1.45   |
| <i>hsa-mir-484</i>    | 0.51 | -1.48  |
| <i>hsa-mir-107</i>    | 0.08 | 3.65   |
| <i>hsa-mir-409</i>    | 0.48 | 1.44   |
| <i>hsa-mir-197</i>    | 0.69 | -1.23  |
| <i>hsa-mir-335</i>    | 0.25 | 1.45   |
| <i>hsa-mir-660</i>    | 0.04 | 1.83   |
| <i>hsa-mir-136</i>    | 0.30 | 1.77   |
| <i>hsa-mir-196a-1</i> | 0.89 | -1.07  |
| <i>hsa-mir-15b</i>    | 0.58 | -1.25  |
| <i>hsa-mir-339</i>    | 0.82 | 1.14   |
| <i>hsa-let-7c</i>     | 0.06 | -2.28  |
| <i>hsa-mir-29b-1</i>  | 0.00 | -7.08  |
| <i>hsa-mir-374a</i>   | 0.24 | -3.79  |
| <i>hsa-mir-1248</i>   | 0.18 | -8.14  |
| <i>hsa-mir-1260</i>   | 0.32 | -3.40  |
| <i>hsa-mir-20a</i>    | 0.46 | -10.87 |
| <i>hsa-mir-3120</i>   | 0.56 | -1.46  |
| <i>hsa-mir-411</i>    | 0.28 | -3.50  |
| <i>hsa-mir-497</i>    | 0.31 | 2.30   |
| <i>hsa-mir-17</i>     | 0.20 | -4.97  |
| <i>hsa-mir-1290</i>   | 0.05 | 4.18   |
| <i>hsa-mir-320b-2</i> | 0.01 | 12.57  |
| <i>hsa-mir-181a-1</i> | 0.30 | 1.46   |
| <i>hsa-mir-501</i>    | 0.51 | 1.65   |
| <i>hsa-mir-147b</i>   | 0.72 | -1.20  |
| <i>hsa-mir-1246</i>   | 0.11 | -3.64  |
| <i>hsa-mir-338</i>    | 0.77 | -1.26  |
| <i>hsa-mir-183</i>    | 0.92 | 1.04   |
| <i>hsa-mir-362</i>    | 0.32 | -5.12  |
| <i>hsa-mir-4328</i>   | 0.57 | -5.90  |
| <i>hsa-mir-130b</i>   | 0.00 | 9.82   |
| <i>hsa-mir-9-2</i>    | 0.11 | -6.40  |
| <i>hsa-mir-301a</i>   | 0.25 | -7.05  |
| <i>hsa-mir-132</i>    | 0.18 | 1.85   |
| <i>hsa-mir-324</i>    | 0.21 | -1.98  |
| <i>hsa-mir-193b</i>   | 0.97 | -1.01  |
| <i>hsa-mir-500a</i>   | 0.29 | 2.10   |
| <i>hsa-mir-374c</i>   | 0.45 | -1.73  |
| <i>hsa-mir-345</i>    | 0.12 | 2.69   |
| <i>hsa-mir-424</i>    | 0.08 | 2.14   |

|                       |      |        |
|-----------------------|------|--------|
| <i>hsa-mir-128-2</i>  | 0.02 | 4.69   |
| <i>hsa-mir-577</i>    | 0.49 | -1.65  |
| <i>hsa-mir-744</i>    | 0.44 | -3.92  |
| <i>hsa-mir-582</i>    | 0.37 | -1.55  |
| <i>hsa-mir-144</i>    | 0.07 | -1.88  |
| <i>hsa-mir-654</i>    | 0.10 | -3.19  |
| <i>hsa-mir-204</i>    | 0.77 | -1.33  |
| <i>hsa-mir-223</i>    | 0.62 | 1.28   |
| <i>hsa-mir-222</i>    | 0.56 | 1.39   |
| <i>hsa-mir-181d</i>   | 0.61 | -1.27  |
| <i>hsa-mir-410</i>    | 0.03 | 5.82   |
| <i>hsa-mir-663</i>    | 0.00 | 32.23  |
| <i>hsa-mir-99a</i>    | 0.79 | 1.59   |
| <i>hsa-mir-1260b</i>  | 0.56 | -9.73  |
| <i>hsa-mir-106a</i>   | 0.15 | -5.04  |
| <i>hsa-mir-421</i>    | 0.00 | 3.94   |
| <i>hsa-mir-589</i>    | 0.19 | 2.58   |
| <i>hsa-mir-34a</i>    | 0.63 | 1.58   |
| <i>hsa-mir-152</i>    | 0.56 | 1.99   |
| <i>hsa-mir-1296</i>   | 0.10 | -1.97  |
| <i>hsa-mir-193a</i>   | 0.91 | -1.05  |
| <i>hsa-mir-652</i>    | 0.98 | -1.02  |
| <i>hsa-mir-454</i>    | 0.36 | -3.32  |
| <i>hsa-mir-185</i>    | 0.83 | 1.17   |
| <i>hsa-mir-140</i>    | 0.40 | 2.75   |
| <i>hsa-mir-598</i>    | 0.01 | -2.50  |
| <i>hsa-mir-619</i>    | 0.00 | 31.78  |
| <i>hsa-mir-134</i>    | 0.59 | -1.26  |
| <i>hsa-mir-1972-2</i> | 0.00 | 79.29  |
| <i>hsa-mir-542</i>    | 0.08 | 1.83   |
| <i>hsa-mir-708</i>    | 0.13 | 2.63   |
| <i>hsa-mir-1304</i>   | 0.01 | 3.47   |
| <i>hsa-mir-1261</i>   | 0.72 | -1.48  |
| <i>hsa-mir-149</i>    | 0.41 | 1.57   |
| <i>hsa-mir-1908</i>   | 0.00 | 20.12  |
| <i>hsa-mir-7-2</i>    | 0.35 | -1.88  |
| <i>hsa-mir-3185</i>   | 0.02 | 9.93   |
| <i>hsa-mir-432</i>    | 0.92 | -1.04  |
| <i>hsa-mir-18a</i>    | 0.12 | -14.06 |
| <i>hsa-mir-664</i>    | 0.63 | 1.64   |
| <i>hsa-mir-331</i>    | 0.66 | -1.36  |
| <i>hsa-mir-671</i>    | 0.61 | 1.38   |
| <i>hsa-mir-3613</i>   | 0.35 | -1.93  |
| <i>hsa-mir-363</i>    | 0.20 | 4.53   |
| <i>hsa-mir-328</i>    | 0.01 | 7.51   |
| <i>hsa-mir-7-1</i>    | 0.62 | 1.15   |

|                       |      |        |
|-----------------------|------|--------|
| <i>hsa-mir-889</i>    | 0.32 | -3.50  |
| <i>hsa-mir-3687</i>   | 0.00 | 164.32 |
| <i>hsa-mir-105-2</i>  | 0.46 | 2.34   |
| <i>hsa-mir-32</i>     | 0.10 | 2.64   |
| <i>hsa-mir-139</i>    | 0.84 | -1.09  |
| <i>hsa-mir-455</i>    | 0.76 | -1.16  |
| <i>hsa-mir-1247</i>   | 0.43 | 4.13   |
| <i>hsa-mir-452</i>    | 0.49 | 1.50   |
| <i>hsa-mir-212</i>    | 0.09 | -24.50 |
| <i>hsa-mir-3135</i>   | 0.49 | 4.09   |
| <i>hsa-mir-1237</i>   | 0.01 | 65.46  |
| <i>hsa-mir-133a-2</i> | 0.43 | -2.26  |
| <i>hsa-mir-1285-1</i> | 0.02 | 9.42   |
| <i>hsa-mir-874</i>    | 0.15 | 3.31   |
| <i>hsa-mir-33b</i>    | 0.93 | 1.07   |
| <i>hsa-mir-502</i>    | 0.17 | 2.31   |
| <i>hsa-mir-1208</i>   | 0.02 | 54.41  |
| <i>hsa-mir-3137</i>   | 0.24 | 4.54   |
| <i>hsa-mir-374b</i>   | 0.45 | -1.73  |
| <i>hsa-mir-369</i>    | 0.02 | 6.18   |
| <i>hsa-mir-548k</i>   | 0.97 | 1.05   |
| <i>hsa-mir-3131</i>   | 0.70 | -1.23  |
| <i>hsa-mir-592</i>    | 0.06 | 3.63   |
| <i>hsa-mir-218-2</i>  | 0.22 | -6.08  |
| <i>hsa-mir-552</i>    | 0.10 | 2.40   |
| <i>hsa-mir-505</i>    | 0.46 | 2.18   |
| <i>hsa-mir-718</i>    | 0.02 | 25.64  |
| <i>hsa-mir-3195</i>   | 0.52 | -1.83  |
| <i>hsa-mir-1180</i>   | 0.19 | 2.40   |
| <i>hsa-mir-493</i>    | 0.21 | -2.54  |
| <i>hsa-mir-1273</i>   | 0.00 | 23.91  |
| <i>hsa-mir-625</i>    | 0.00 | 15.45  |
| <i>hsa-mir-299</i>    | 0.02 | 2.76   |
| <i>hsa-mir-1275</i>   | 0.13 | -12.22 |
| <i>hsa-mir-1292</i>   | 0.00 | 18.37  |
| <i>hsa-mir-1281</i>   | 0.00 | 15.56  |
| <i>hsa-mir-629</i>    | 0.02 | 4.41   |
| <i>hsa-mir-138-1</i>  | 0.91 | 1.13   |
| <i>hsa-mir-33a</i>    | 0.17 | -2.03  |
| <i>hsa-mir-30c-1</i>  | 0.40 | -3.56  |
| <i>hsa-let-7f-1</i>   | 0.08 | 2.00   |
| <i>hsa-mir-1303</i>   | 0.02 | 9.24   |
| <i>hsa-mir-377</i>    | 0.83 | -1.18  |
| <i>hsa-mir-382</i>    | 0.76 | 1.29   |
| <i>hsa-mir-3656</i>   | 0.00 | 27.13  |
| <i>hsa-mir-584</i>    | 0.01 | 9.33   |

|                       |      |       |
|-----------------------|------|-------|
| <i>hsa-mir-96</i>     | 0.50 | -2.42 |
| <i>hsa-mir-887</i>    | 0.54 | 2.78  |
| <i>hsa-mir-561</i>    | 0.83 | 1.11  |
| <i>hsa-mir-125b-1</i> | 0.63 | 2.78  |
| <i>hsa-mir-95</i>     | 0.91 | 1.10  |
| <i>hsa-mir-483</i>    | 0.01 | 23.40 |
| <i>hsa-mir-487b</i>   | 0.80 | -1.18 |
| <i>hsa-mir-1469</i>   | 0.02 | 17.01 |
| <i>hsa-mir-3614</i>   | 0.03 | 3.51  |
| <i>hsa-mir-651</i>    | 0.72 | 1.46  |
| <i>hsa-mir-135a-1</i> | 0.82 | 1.20  |
| <i>hsa-mir-3180-3</i> | 0.31 | 1.85  |
| <i>hsa-mir-1301</i>   | 0.64 | -1.56 |
| <i>hsa-mir-153-2</i>  | 0.33 | -2.73 |
| <i>hsa-mir-576</i>    | 0.12 | 2.39  |
| <i>hsa-mir-3607</i>   | 0.87 | 1.18  |
| <i>hsa-mir-365-2</i>  | 0.85 | -1.23 |
| <i>hsa-mir-4281</i>   | 0.00 | 21.48 |
| <i>hsa-mir-26a-2</i>  | 0.83 | -1.28 |
| <i>hsa-mir-34c</i>    | 0.60 | -1.74 |
| <i>hsa-mir-337</i>    | 0.30 | -3.11 |
| <i>hsa-mir-3141</i>   | 0.05 | 3.44  |
| <i>hsa-mir-3162</i>   | 0.78 | 1.30  |
| <i>hsa-mir-365-1</i>  | 0.73 | 2.09  |
| <i>hsa-mir-548e</i>   | 0.03 | 5.04  |
| <i>hsa-mir-376a-1</i> | 0.36 | -4.32 |
| <i>hsa-mir-590</i>    | 0.20 | -7.08 |
| <i>hsa-mir-596</i>    | 0.00 | 58.64 |
| <i>hsa-mir-638</i>    | 0.00 | 33.40 |
| <i>hsa-mir-370</i>    | 0.97 | 1.04  |
| <i>hsa-mir-4286</i>   | 0.67 | -1.71 |
| <i>hsa-mir-3692</i>   | 0.52 | -3.28 |
| <i>hsa-mir-485</i>    | 0.38 | -3.90 |
| <i>hsa-mir-636</i>    | 0.70 | 26.30 |
| <i>hsa-mir-24-2</i>   | 0.94 | 1.07  |
| <i>hsa-mir-762</i>    | 0.62 | 14.04 |
| <i>hsa-mir-766</i>    | 0.49 | 1.96  |
| <i>hsa-mir-548i-4</i> | 0.42 | -3.40 |
| <i>hsa-mir-296</i>    | 0.02 | 5.38  |
| <i>hsa-mir-1249</i>   | 0.03 | 3.36  |
| <i>hsa-mir-3196</i>   | 0.01 | 5.91  |
| <i>hsa-mir-665</i>    | 0.45 | 4.31  |
| <i>hsa-mir-135b</i>   | 0.30 | -4.37 |
| <i>hsa-mir-330</i>    | 0.81 | 1.47  |
| <i>hsa-mir-450a-2</i> | 0.91 | 1.11  |
| <i>hsa-mir-101-1</i>  | 0.93 | 1.09  |

|                        |      |        |
|------------------------|------|--------|
| <i>hsa-mir-3936</i>    | 0.60 | -2.98  |
| <i>hsa-mir-548f-1</i>  | 0.99 | -1.02  |
| <i>hsa-mir-1273d</i>   | 0.02 | 18.04  |
| <i>hsa-mir-450b</i>    | 0.10 | 7.27   |
| <i>hsa-mir-1181</i>    | 0.02 | 5.01   |
| <i>hsa-mir-663b</i>    | 0.71 | 1.49   |
| <i>hsa-mir-3620</i>    | 0.01 | 6.38   |
| <i>hsa-mir-320c-2</i>  | 0.19 | 4.63   |
| <i>hsa-mir-3142</i>    | 0.72 | 19.47  |
| <i>hsa-mir-548t</i>    | 0.01 | 3.99   |
| <i>hsa-mir-323</i>     | 0.53 | 3.64   |
| <i>hsa-mir-658</i>     | 0.04 | 9.09   |
| <i>hsa-mir-511-2</i>   | 0.66 | 2.23   |
| <i>hsa-mir-379</i>     | 0.71 | 1.58   |
| <i>hsa-mir-92a-1</i>   | 0.10 | -6.37  |
| <i>hsa-mir-2861</i>    | 0.01 | 35.53  |
| <i>hsa-mir-187</i>     | 0.03 | 26.07  |
| <i>hsa-mir-128-1</i>   | 0.58 | 5.09   |
| <i>hsa-mir-1976</i>    | 0.03 | 11.13  |
| <i>hsa-mir-1262</i>    | 0.44 | 5.57   |
| <i>hsa-mir-422a</i>    | 0.57 | 3.26   |
| <i>hsa-mir-1271</i>    | 0.62 | -2.57  |
| <i>hsa-mir-433</i>     | 0.07 | -10.33 |
| <i>hsa-mir-224</i>     | 0.60 | 4.83   |
| <i>hsa-mir-3615</i>    | 0.44 | 2.85   |
| <i>hsa-mir-154</i>     | 0.69 | 1.52   |
| <i>hsa-mir-1-1</i>     | 0.50 | -2.40  |
| <i>hsa-mir-3127</i>    | 0.42 | 4.57   |
| <i>hsa-mir-3182</i>    | 0.57 | 3.19   |
| <i>hsa-mir-3677</i>    | 0.53 | 3.08   |
| <i>hsa-mir-1283-2</i>  | 0.72 | 2.50   |
| <i>hsa-mir-3605</i>    | 0.65 | 2.16   |
| <i>hsa-mir-1287</i>    | 0.66 | 1.57   |
| <i>hsa-mir-642b</i>    | 0.78 | 1.76   |
| <i>hsa-mir-873</i>     | 0.08 | 9.22   |
| <i>hsa-mir-548aa-1</i> | 0.00 | 4.50   |
| <i>hsa-mir-548d-1</i>  | 0.00 | 4.50   |
| <i>hsa-mir-184</i>     | 0.02 | 8.35   |
| <i>hsa-mir-504</i>     | 0.70 | -1.37  |
| <i>hsa-mir-641</i>     | 0.65 | -1.92  |
| <i>hsa-mir-758</i>     | 0.45 | -2.70  |
| <i>hsa-mir-3150</i>    | 0.47 | 3.77   |
| <i>hsa-mir-3913-2</i>  | 0.41 | -3.24  |
| <i>hsa-mir-566</i>     | 0.04 | 15.98  |
| <i>hsa-mir-940</i>     | 0.49 | 5.58   |
| <i>hsa-mir-3651</i>    | 0.58 | 4.98   |

|                       |      |       |
|-----------------------|------|-------|
| <i>hsa-mir-2277</i>   | 0.60 | 2.95  |
| <i>hsa-mir-412</i>    | 0.59 | 2.22  |
| <i>hsa-mir-3934</i>   | 0.80 | 1.53  |
| <i>hsa-mir-3940</i>   | 0.84 | 1.39  |
| <i>hsa-mir-550a-2</i> | 0.58 | 1.59  |
| <i>hsa-mir-550b-2</i> | 0.58 | 1.59  |
| <i>hsa-mir-580</i>    | 0.05 | 55.05 |
| <i>hsa-mir-939</i>    | 0.75 | 18.41 |
| <i>hsa-mir-1291</i>   | 0.54 | 6.49  |
| <i>hsa-mir-1193</i>   | 0.55 | 3.93  |
| <i>hsa-mir-2355</i>   | 0.43 | 3.08  |
| <i>hsa-mir-1233-2</i> | 0.57 | 2.82  |
| <i>hsa-mir-18b</i>    | 0.69 | 1.53  |
| <i>hsa-mir-627</i>    | 0.72 | 3.17  |
| <i>hsa-mir-2110</i>   | 1.00 | -1.01 |
| <i>hsa-mir-662</i>    | 0.60 | -1.93 |
| <i>hsa-mir-1266</i>   | 0.55 | -2.34 |
| <i>hsa-mir-668</i>    | 0.53 | -2.57 |
| <i>hsa-mir-124-2</i>  | 0.48 | -4.00 |
| <i>hsa-mir-3158-1</i> | 0.90 | -1.17 |
| <i>hsa-mir-3158-2</i> | 0.90 | -1.17 |
| <i>hsa-mir-1913</i>   | 0.03 | 60.62 |
| <i>hsa-mir-3928</i>   | 0.01 | 17.32 |
| <i>hsa-mir-2116</i>   | 0.62 | 5.71  |
| <i>hsa-mir-1468</i>   | 0.85 | 1.36  |
| <i>hsa-mir-655</i>    | 0.98 | -1.04 |
| <i>hsa-mir-3912</i>   | 0.96 | -1.08 |
| <i>hsa-mir-578</i>    | 0.62 | -1.98 |
| <i>hsa-mir-657</i>    | 0.59 | -4.25 |
| <i>hsa-mir-133b</i>   | 0.09 | -8.60 |
| <i>hsa-mir-3622a</i>  | 0.58 | 3.52  |
| <i>hsa-mir-572</i>    | 0.02 | 19.29 |
| <i>hsa-mir-1909</i>   | 0.69 | 10.12 |
| <i>hsa-mir-219-2</i>  | 0.73 | 9.13  |
| <i>hsa-mir-3922</i>   | 0.69 | 8.47  |
| <i>hsa-mir-937</i>    | 0.61 | 8.37  |
| <i>hsa-mir-4298</i>   | 0.47 | 8.17  |
| <i>hsa-mir-3619</i>   | 0.71 | 6.67  |
| <i>hsa-mir-659</i>    | 0.74 | 4.85  |
| <i>hsa-mir-1254</i>   | 0.45 | 4.61  |
| <i>hsa-mir-1288</i>   | 0.64 | 4.02  |
| <i>hsa-mir-624</i>    | 0.59 | 2.77  |
| <i>hsa-mir-31</i>     | 0.53 | 2.70  |
| <i>hsa-mir-3662</i>   | 0.83 | 1.46  |
| <i>hsa-mir-491</i>    | 0.85 | 1.36  |
| <i>hsa-mir-1306</i>   | 0.98 | 1.03  |



|                         |      |       |
|-------------------------|------|-------|
| <i>hsa-mir-656</i>      | 0.76 | -1.43 |
| <i>hsa-mir-877</i>      | 0.75 | -1.47 |
| <i>hsa-mir-548c</i>     | 0.78 | 1.31  |
| <i>hsa-mir-548z</i>     | 0.78 | 1.31  |
| <i>hsa-mir-1286</i>     | 0.60 | 9.64  |
| <i>hsa-mir-618</i>      | 0.56 | 4.03  |
| <i>hsa-mir-323b</i>     | 0.67 | 2.93  |
| <i>hsa-mir-509-3</i>    | 0.71 | 2.76  |
| <i>hsa-mir-616</i>      | 0.85 | 1.40  |
| <i>hsa-mir-487a</i>     | 0.12 | -8.93 |
| <i>hsa-mir-3116-2</i>   | 0.74 | 5.13  |
| <i>hsa-mir-539</i>      | 0.74 | 5.36  |
| <i>hsa-mir-506</i>      | 0.56 | 3.22  |
| <i>hsa-mir-3192</i>     | 0.72 | 2.62  |
| <i>hsa-mir-3170</i>     | 0.85 | 1.35  |
| <i>hsa-mir-612</i>      | 0.88 | 1.25  |
| <i>hsa-mir-637</i>      | 0.81 | 10.04 |
| <i>hsa-mir-219-1</i>    | 0.68 | 7.15  |
| <i>hsa-mir-2113</i>     | 0.66 | 6.25  |
| <i>hsa-mir-615</i>      | 0.62 | 4.73  |
| <i>hsa-mir-1299</i>     | 0.57 | 4.39  |
| <i>hsa-mir-1183</i>     | 0.71 | 3.42  |
| <i>hsa-mir-760</i>      | 0.71 | 2.53  |
| <i>hsa-mir-1269</i>     | 0.56 | 2.31  |
| <i>hsa-mir-494</i>      | 0.74 | 2.05  |
| <i>hsa-mir-548w</i>     | 0.78 | 1.69  |
| <i>hsa-mir-548b</i>     | 0.78 | 1.62  |
| <i>hsa-mir-606</i>      | 0.84 | 1.43  |
| <i>hsa-mir-103-2-as</i> | 0.57 | 4.27  |
| <i>hsa-mir-3913-1</i>   | 0.33 | -3.24 |
| <i>hsa-mir-3123</i>     | 0.82 | 11.11 |
| <i>hsa-mir-3133</i>     | 0.71 | 10.65 |
| <i>hsa-mir-3939</i>     | 0.72 | 9.42  |
| <i>hsa-mir-554</i>      | 0.66 | 8.55  |
| <i>hsa-mir-1228</i>     | 0.67 | 5.87  |
| <i>hsa-mir-320d-2</i>   | 0.75 | 5.60  |
| <i>hsa-mir-3175</i>     | 0.74 | 5.36  |
| <i>hsa-mir-591</i>      | 0.74 | 5.20  |
| <i>hsa-mir-3139</i>     | 0.74 | 5.02  |
| <i>hsa-mir-4290</i>     | 0.74 | 4.85  |
| <i>hsa-mir-3194</i>     | 0.74 | 4.84  |
| <i>hsa-mir-320e</i>     | 0.73 | 4.79  |
| <i>hsa-mir-3675</i>     | 0.57 | 4.58  |
| <i>hsa-mir-541</i>      | 0.57 | 4.39  |
| <i>hsa-mir-570</i>      | 0.73 | 4.28  |
| <i>hsa-mir-3125</i>     | 0.72 | 4.07  |

|                       |      |        |
|-----------------------|------|--------|
| <i>hsa-mir-1915</i>   | 0.71 | 3.45   |
| <i>hsa-mir-515-2</i>  | 0.72 | 2.93   |
| <i>hsa-mir-556</i>    | 0.72 | 2.80   |
| <i>hsa-mir-1289-2</i> | 0.76 | 1.93   |
| <i>hsa-mir-1282</i>   | 0.76 | 1.87   |
| <i>hsa-mir-548v</i>   | 0.77 | 1.71   |
| <i>hsa-mir-34b</i>    | 0.87 | 1.26   |
| <i>hsa-mir-3691</i>   | 0.87 | 1.26   |
| <i>hsa-mir-1200</i>   | 0.89 | 1.22   |
| <i>hsa-mir-3925</i>   | 0.08 | -7.01  |
| <i>hsa-mir-650</i>    | 0.75 | 14.39  |
| <i>hsa-mir-4269</i>   | 0.66 | 8.55   |
| <i>hsa-mir-29b-2</i>  | 0.78 | 7.35   |
| <i>hsa-mir-4285</i>   | 0.77 | 6.96   |
| <i>hsa-mir-3176</i>   | 0.62 | 6.32   |
| <i>hsa-mir-3143</i>   | 0.75 | 5.60   |
| <i>hsa-mir-1224</i>   | 0.75 | 5.60   |
| <i>hsa-mir-196a-2</i> | 0.74 | 4.84   |
| <i>hsa-mir-3617</i>   | 0.73 | 4.62   |
| <i>hsa-mir-3661</i>   | 0.57 | 4.34   |
| <i>hsa-mir-1911</i>   | 0.72 | 3.48   |
| <i>hsa-mir-3144</i>   | 0.72 | 2.80   |
| <i>hsa-mir-3664</i>   | 0.72 | 2.80   |
| <i>hsa-mir-1537</i>   | 0.72 | 2.68   |
| <i>hsa-mir-936</i>    | 0.72 | 2.56   |
| <i>hsa-mir-888</i>    | 0.90 | 1.23   |
| <i>hsa-mir-3138</i>   | 0.90 | 1.23   |
| <i>hsa-mir-1203</i>   | 0.90 | 1.23   |
| <i>hsa-mir-217</i>    | 0.43 | -15.09 |
| <i>hsa-mir-548q</i>   | 0.46 | -17.45 |
| <i>hsa-mir-4323</i>   | 0.78 | 7.60   |
| <i>hsa-mir-3161</i>   | 0.77 | 6.96   |
| <i>hsa-mir-3943</i>   | 0.77 | 6.96   |
| <i>hsa-mir-3187</i>   | 0.75 | 5.60   |
| <i>hsa-mir-3153</i>   | 0.75 | 5.60   |
| <i>hsa-mir-516a-2</i> | 0.75 | 5.60   |
| <i>hsa-mir-921</i>    | 0.74 | 4.85   |
| <i>hsa-mir-216b</i>   | 0.73 | 4.28   |
| <i>hsa-mir-3611</i>   | 0.73 | 4.28   |
| <i>hsa-mir-378b</i>   | 0.72 | 3.86   |
| <i>hsa-mir-4260</i>   | 0.73 | 2.46   |
| <i>hsa-mir-611</i>    | 0.73 | 2.46   |
| <i>hsa-mir-3156-2</i> | 0.73 | 2.46   |
| <i>hsa-mir-1293</i>   | 0.76 | 1.88   |
| <i>hsa-mir-3167</i>   | 0.76 | 1.88   |
| <i>hsa-mir-661</i>    | 0.76 | 1.88   |
