# Supplementary material for: Specific MicroRNA Pattern in Colon Tissue of Young Children with Eosinophilic Colitis
Source: MDPI journal article supplement (doi:10.3390/ijms18051050), 2017-05-12
Supplement: s1 [file s1]

**Supplementary Table 2.** Target genes of miRs resulted from the next generation sequencing of colonic samples and their related gene ontology (GO) terms (.B-H: P- values were corrected by the Benjamini-Hochberg method).

| GO Terms                                                                    | Genes                                                                                                                                                                        | B-H    |
|-----------------------------------------------------------------------------|------------------------------------------------------------------------------------------------------------------------------------------------------------------------------|--------|
| <i>positive regulation of transcription from RNA polymerase II promoter</i> | E2F1, HMGB1, CCNT1, TLR2, ZEB1, REST, SRF, APP, HNRNPK, IL1B, YAP1, MYC, BCL9, AKT2, EGFR, NTF3, SMAD2, HMGA1, BRCA1, STAT3, UHRF1, EP300, NCOA3, SP1, VEGFA, MAPK3, SMARCA4 | 0.0000 |
| <i>transcription, DNA-templated</i>                                         | E2F1, BMI1, ERG, ERBB2, RCOR1, CCNT1, EZH2, YBX3, FASLG, SMAD2, ZEB1, TOPORS, DAXX, BRCA1, PURA, EYA4, UHRF1, TSPYL2, SP1, KHSRP, DNMT1, LRRFIP1, MN1, MYC, HDAC6, SMARCA4   | 0.0046 |
| <i>negative regulation of transcription from RNA polymerase II promoter</i> | E2F1, BMI1, DNMT3A, HMGB1, PHB, RCOR1, EZH2, YBX3, FASLG, SMAD2, ZEB1, REST, DAXX, SNAI1, STAT3, UHRF1, EP300, HNRNPK, VEGFA, DNMT1, IL1B, MYC, SMARCA4                      | 0.0000 |
| <i>innate immune response</i>                                               | EGFR, HMGB1, GRB2, MAP2K3, ERBB2, WASF2, TLR2, IRS1, PTEN, IKBKE, APP, CDKN1A, EP300, CDKN1B, MAPK3, IL1B, SHC1, LRRFIP1, TNFAIP3                                            | 0.0008 |
| <i>gene expression</i>                                                      | DNMT3A, YWHAZ, EZH2, CCNT1, ELAVL1, SMAD2, SMN1, UHRF1, EP300, HNRNPK, SP1, PCBP1, WDR77, MAPK3, KHSRP, WDR4, DNMT1, YAP1, MYC                                               | 0.0021 |
| <i>signal transduction</i>                                                  | EGFR, RET, YWHAZ, ERG, NTF3, TP53BP2, PHB, MAP2K3, ERBB2, TLR2, FASLG, IRS1, STAT3, ATM, HNRNPK, HGS, IL1B, AKT2                                                             | 0.0109 |
| <i>negative regulation of transcription, DNA-templated</i>                  | E2F1, PHB, RCOR1, EZH2, SMAD2, REST, ZEB1, DAXX, PDCD4, HMGA1, BRCA1, PURA, CDKN1B, PBXIP1, LRRFIP1, HDAC6, SMARCA4                                                          | 0.0000 |
| <i>apoptotic process</i>                                                    | E2F1, RTN4, HMGB1, YWHAZ, TGFBR2, TLR2, FASLG, DAXX, PDCD4, PTEN, BRCA1, EP300, MAPK3, IL1B, APAF1, TNFAIP3, APC                                                             | 0.0001 |
| <i>positive regulation of transcription, DNA-templated</i>                  | E2F1, RET, MAP2K3, PHB, SMAD2, REST, TOPORS, SNAI1, HMGA1, STAT3, BRCA1, SP1, NCOA3, IL1B, MYC, SMARCA4                                                                      | 0.0001 |
| <i>negative regulation of cell proliferation</i>                            | CDKN1A, CDKN1B, INPPL1, PHB, HGS, IL1B, SMAD2, ZEB1, REST, SRF, PTEN, HMGA1, STAT3, APC                                                                                      | 0.0002 |
| <i>viral process</i>                                                        | MSH6, GRB2, RCOR1, WASF2, CCNT1, DAXX, HMGA1, STAT3, EP300, HNRNPK, SP1, MAPK3, BNIP3L, SHC1                                                                                 | 0.0025 |
| <i>positive regulation of cell proliferation</i>                            | EGFR, NTF3, TGFBR2, FASLG, PTEN, IRS1, PURA, CDKN1B, WDR77, VEGFA, SHC1, YAP1, MYC                                                                                           | 0.0025 |
| <i>negative regulation of apoptotic process</i>                             | EGFR, CDKN1A, YWHAZ, CDKN1B, HNRNPK, CD44, BNIP3L, VEGFA, TOPORS, PTEN, PDCD4, MYC, STAT3                                                                                    | 0.0036 |
| <i>blood coagulation</i>                                                    | YWHAZ, BSG, GRB2, RCOR1, L1CAM, WEE1, SLC7A11, APP, CD44, ATP2A2, VEGFA, MAPK3, SHC1                                                                                         | 0.0036 |
| <i>aging</i>                                                                | DNMT3A, HNRNPK, TFRC, TGFBR2, DNMT1, IL1B, SHC1, APAF1, CCL5, PTEN, STAT3                                                                                                    | 0.0000 |
| <i>neurotrophin TRK receptor signaling pathway</i>                          | RTN4, EGFR, CDKN1A, CDKN1B, GRB2, ERBB2, MAPK3, SHC1, PTEN, IRS1, STAT3                                                                                                      | 0.0109 |
| <i>positive regulation of cell migration</i>                                | EGFR, RET, NTF3, VEGFA, NUMB, CCL5, IRS1, SNAI1, AKT2, APC                                                                                                                   | 0.0002 |
| <i>positive regulation of gene expression</i>                               | E2F1, CD44, NCOA3, VEGFA, TLR2, DNMT1, IL1B, HGS, HSPA1B, BRCA1                                                                                                              | 0.0017 |
| <i>MAPK cascade</i>                                                         | EGFR, RET, GRB2, ERBB2, MAPK3, IL1B, SHC1, CCL5, IRS1, MYC                                                                                                                   | 0.0021 |
| <i>nervous system development</i>                                           | BDNF, EP300, NTF3, VEGFA, L1CAM, APAF1, STAT3, SMN1, SMARCA4, PURA                                                                                                           | 0.0035 |

|                                                                            |                                                                         |        |
|----------------------------------------------------------------------------|-------------------------------------------------------------------------|--------|
| <i>epidermal growth factor<br/>receptor signaling pathway</i>              | EGFR, CDKN1A, CDKN1B, GRB2, ERBB2, MAPK3, HGS, SHC1,<br>PTEN, IRS1      | 0.0106 |
| <i>response to drug</i>                                                    | CDKN1A, RET, BDNF, CDKN1B, TGFBR2, CCL5, PTEN, MYC, STAT3,<br>APC       | 0.0111 |
| <i>regulation of transcription<br/>from RNA polymerase II<br/>promoter</i> | HMGB1, ERG, VEGFA, WDR77, LRRFIP1, ZEB1, BRCA1, STAT3,<br>SMARCA4, PURA | 0.0225 |
| <i>axon guidance</i>                                                       | EGFR, BDNF, NTF3, GRB2, ERBB2, MAPK3, NUMB, SHC1, L1CAM,<br>IRS1        | 0.2818 |

---
